# Supplementary material for: An evidence-based lexical pattern approach for quality assurance of Gene Ontology relations
Source: PubMed Central journal article supplement — Brief Bioinform. 2022 Apr 13;23(3):bbac122. doi: 10.1093/bib/bbac122 (PMC9116247; doi:10.1093/bib/bbac122), 2022-04-13
Supplement: go-pi-reply_bbac122.pdf [file go-pi-reply_bbac122.pdf]

## Re: Collaboration on a Gene Ontology related manuscript submitted to Briefings in Bioinformatics

Paul Denis Thomas <pdthomas@usc.edu>

Tue 2/22/2022 3:01 PM

To: Cui, Licong <Licong.Cui@uth.tmc.edu>

 4 attachments (2 MB)

Missing relations.xlsx; Erroneous existing relations.xlsx; manuscript.pdf; Screen Shot 2022-02-14 at 10.09.24 AM.png;

**\*\*\*\* EXTERNAL EMAIL \*\*\*\***

Dear Licong,

Thanks for contacting me. I've discussed your proposal in detail with the GO editorial team, and we think it isn't necessary for a GO team member to be on your paper. From an initial review it seems that most of the problematic or missing relations you have listed are correctly identified. We are already working on improvements to GO that will address the issues you have identified, including adding missing axioms for some GO terms, working with external ontology teams (e.g. ChEBI), and restructuring specific parts of the ontology. That said, it is still useful for us to know about these specific issues and we very much appreciate that you have submitted your list of problematic or missing relations to our Helpdesk. Thank you for helping to make GO a reliable community resource!

Best,  
Paul.

Le 14 févr. 2022 à 17:21, Cui, Licong <Licong.Cui@uth.tmc.edu> a écrit :

Dear Dr. Thomas,

Hope this email finds you well. This is Licong Cui from The University of Texas Health Science Center at Houston. One of my research interests is biomedical ontology quality assurance. We have a recent work on quality assurance of relations in Gene Ontology (GO) and submitted a manuscript to Briefings in Bioinformatics. In this work, we identified 821 missing relations and 45 erroneous relations in GO. Please find ten of the representatives in the following screenshot for a quick inspection (see attached excel files for a complete list).

The manuscript has received favorable reviews from two of three reviewers, but the third reviewer recommends that we obtain direct feedback from the GO consortium about these relations and make requests of the corresponding changes.

I would like to invite you as a collaborator/co-author for this work and help us review these relations, if you are interested and your time commitment permits. I have also attached the manuscript for your reference.

The journal office asks a quick turn around on revision as usual, so your response is greatly appreciated.

Best regards,

Licong

--

Licong Cui, PhD

Assistant Professor

School of Biomedical Informatics

Texas Institute for Restorative Neurotechnologies

Center for Biomedical Semantics & Data Intelligence

University of Texas Health Science Center at Houston (UTHealth)

Email: [licong.cui@uth.tmc.edu](mailto:licong.cui@uth.tmc.edu)

Web: <https://sbmi.uth.edu/cuilab/>
